# Supplementary material
Source: PubMed Central journal article supplement (PMC3461907)

## Figure S1

GATA-2 occupancy of loci dysregulated by the +9.5 mutation in PECAM-1 positive cells.

Genome-wide ChIP-seq analysis of GATA-2 occupancy in HUVEC cells was previously described (43). Signal maps of GATA-2 occupancy at loci identified by microarray in

Figure 8 were mined from the data. The ChIP-seq profiles show chromosomal position vs. GATA-2 peak height.

**Table S1**

E-box-GATA composite elements in the human genome.

Fig. S1

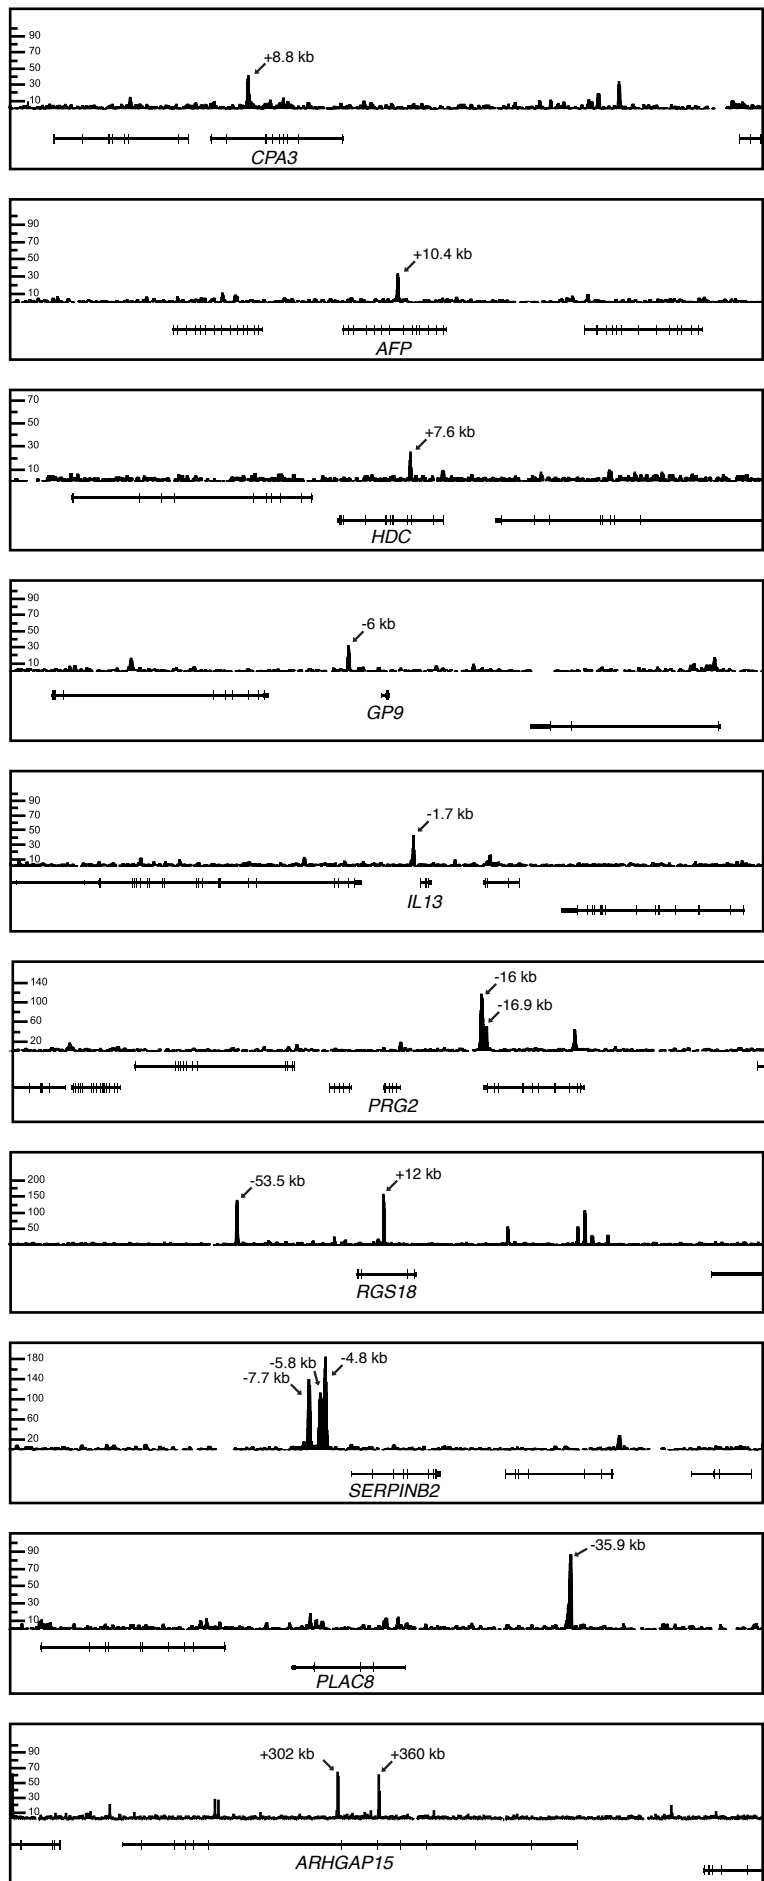

Supplement: JCI61623sd.pdf [file JCI61623sd.pdf]
